# Supplementary material for: Cholecystokinin 1 receptor activation restores normal mTORC1 signaling and is protective to Purkinje cells of SCA mice
Source: PubMed Central journal article supplement — Cell Rep. Author manuscript; Available in PMC 2022 Mar 11. (PMC8916043; doi:10.1016/j.celrep.2021.109831), 2021-10-12
Supplement: NIHMS1781847-supplement-Supplemental_material.pdf [file NIHMS1781847-supplement-Supplemental_material.pdf]

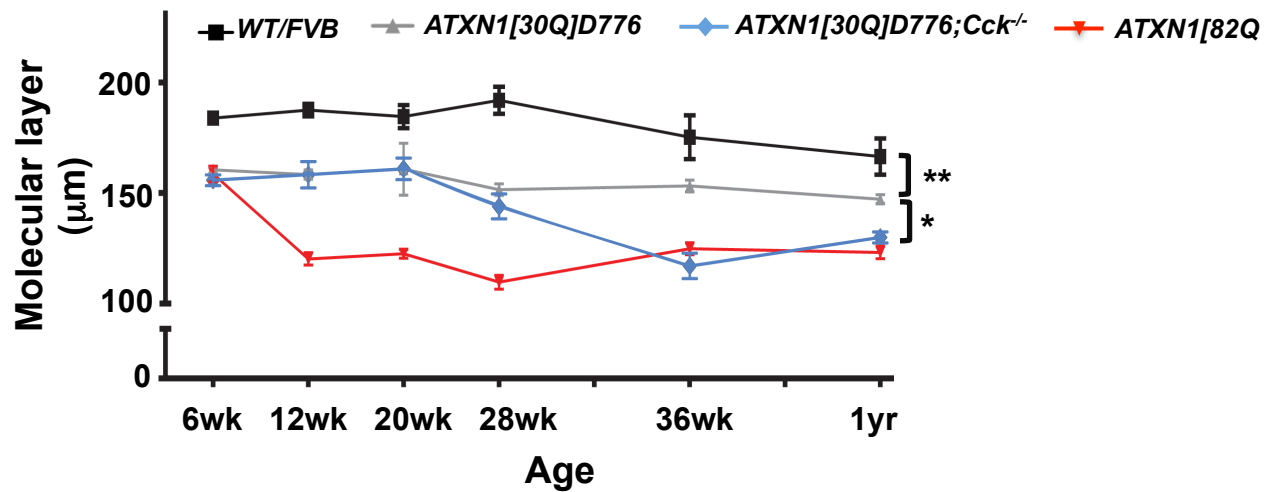

**Figure S1. Purkinje cell Atrophy in ATXN1 Mice with Age.** Purkinje Cell atrophy was assessed by measuring thickness of the cerebellar molecular layer. n>6 per group Two-way ANOVA, tukey post-hoc test. \*p<0.05 \*\*p<0.01.

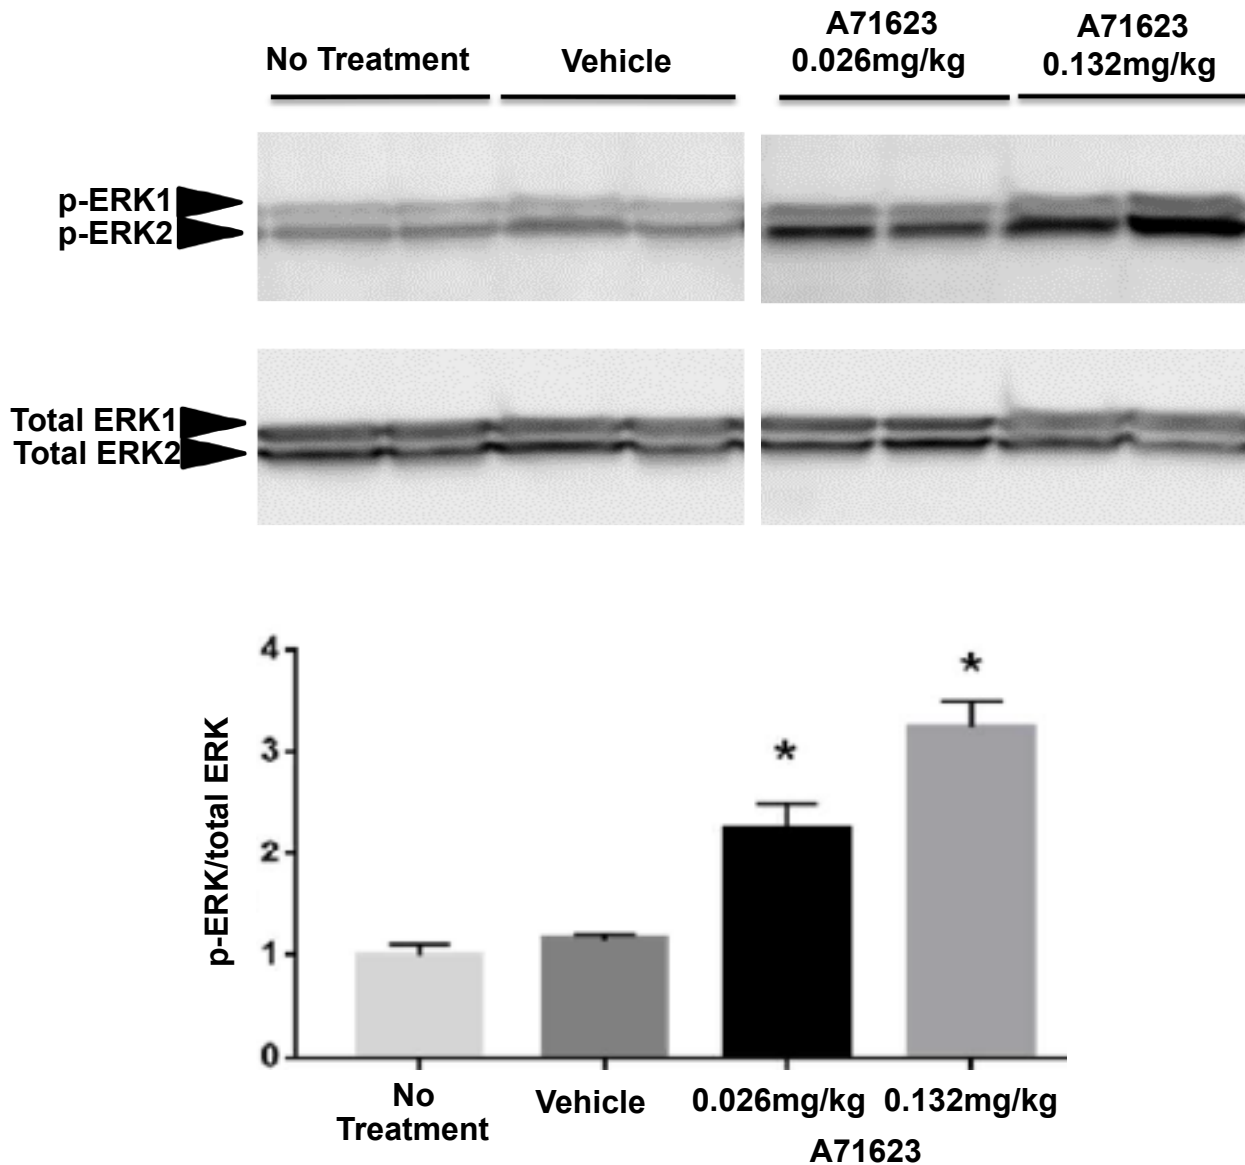

**Figure S2. IP Injection of Cck1R agonist A71623 Increases cerebellar phospho-ERK1/2 - Related to Figure 1.** A) Western blot of phospho-ERK1/2 (P-ERK) and total ERK1/2. Two doses were administered i.p. to WT/FVB mice. Cerebella were harvested 24 hours post-injection. B) Quantification of (A). n=2 per group. One-Way ANOVA, tukey post-hoc test, \*p<0.05.

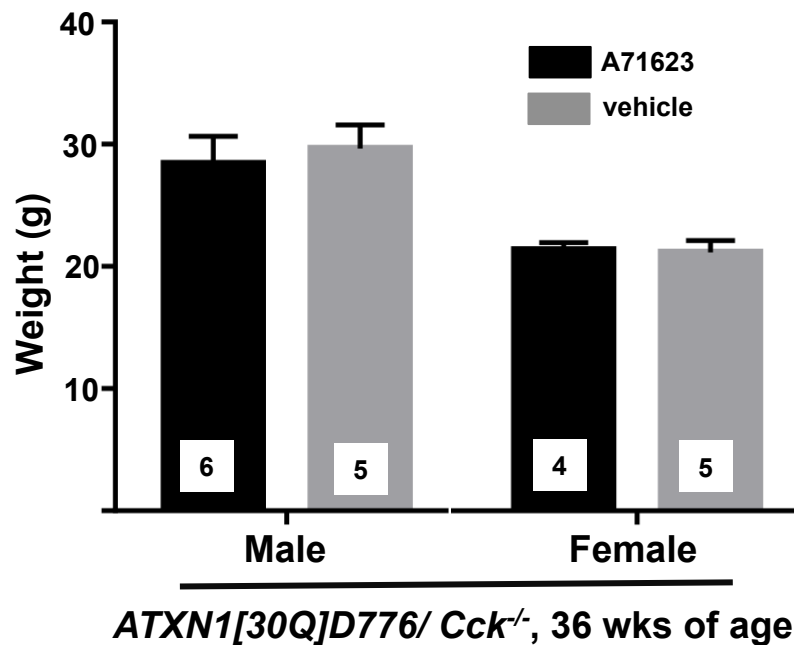

**Figure S3. Administration of Cck1R agonist A71623 Does not Alter Weight of *ATXN1[30Q]-D776/Cck<sup>-/-</sup>* Mice.** Male and female *ATXN1[30Q]-D776/Cck<sup>-/-</sup>* mice weighed following IP administration of A71623 (0.026mg, 30nmoles/Kg/day) or vehicle via osmotic pumps for 36 weeks.

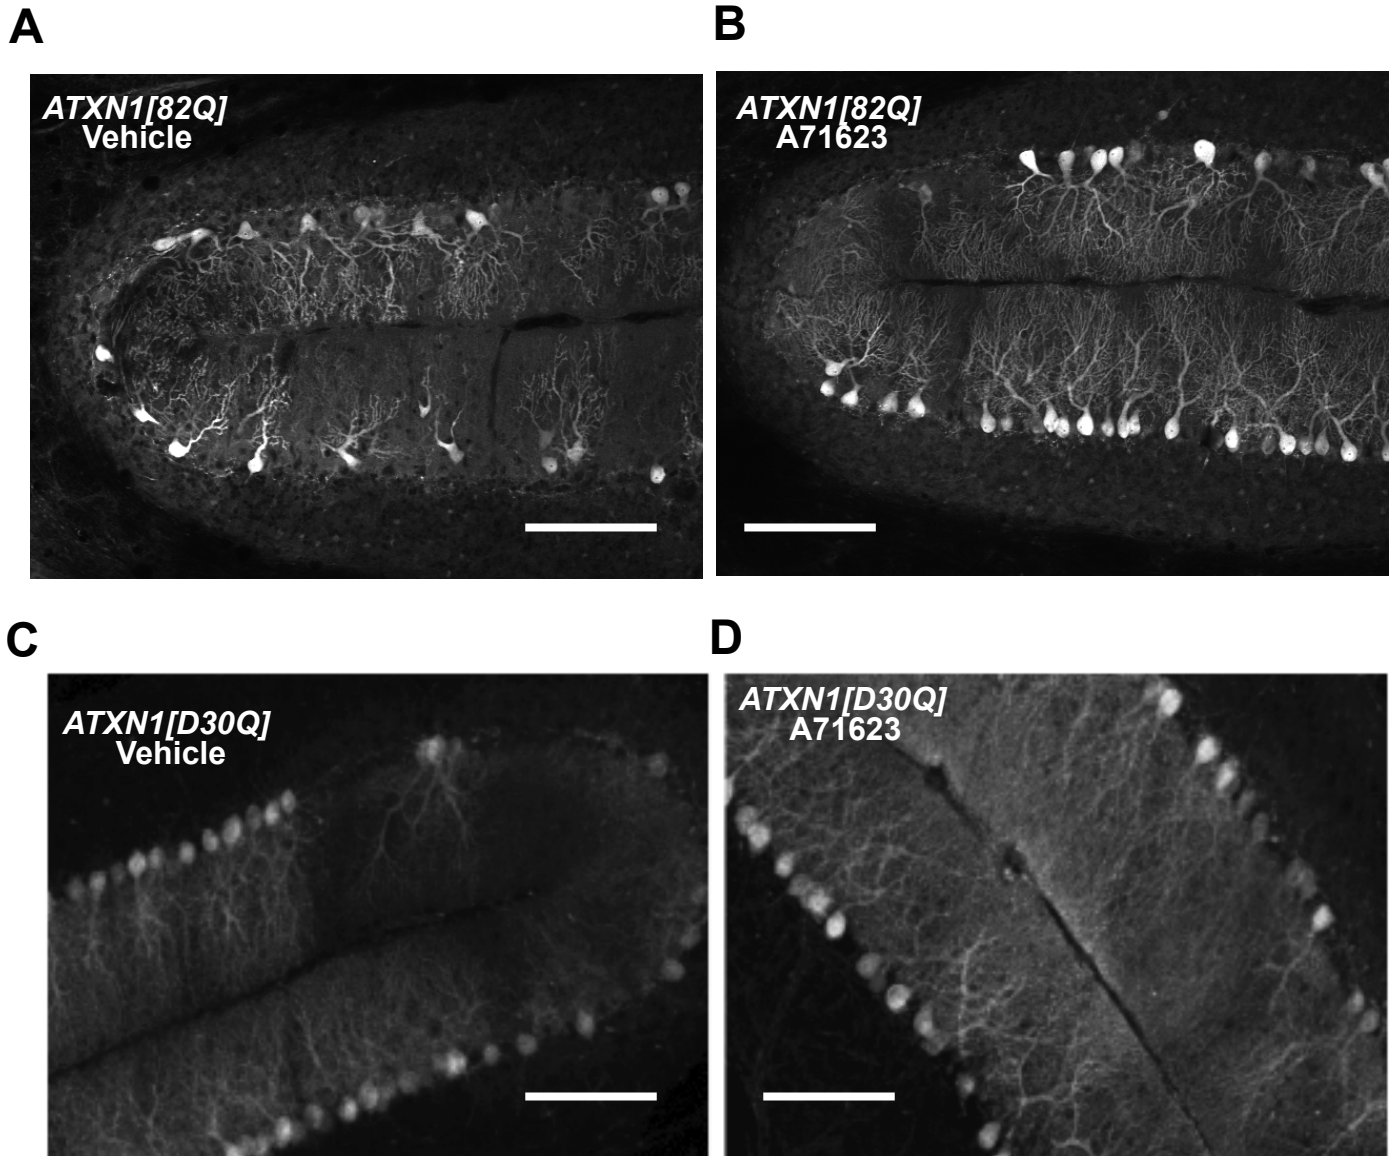

**Figure S4. Administration of Cck1R agonist A71623 improves cerebellar molecular thickness in ATXN1[82Q] and ATXN1[30Q]D776/Cck<sup>-/-</sup> mice - Related to Figures 1 and 3.** Immunohistochemical staining of calbindin a Purkinje cell-specific marker. (A) A71623 (0.026mg, 30nmoles/Kg/day) or (B) vehicle was administered for 12 weeks via IP osmotic pumps to ATXN1[82Q] mice. (C) A71623 (0.026mg, 30nmoles/Kg/day) or (D) vehicle was administered for 36 weeks via IP osmotic pumps to ATXN1[30Q]D776/Cck<sup>-/-</sup> mice. Scale bar = 100μM.

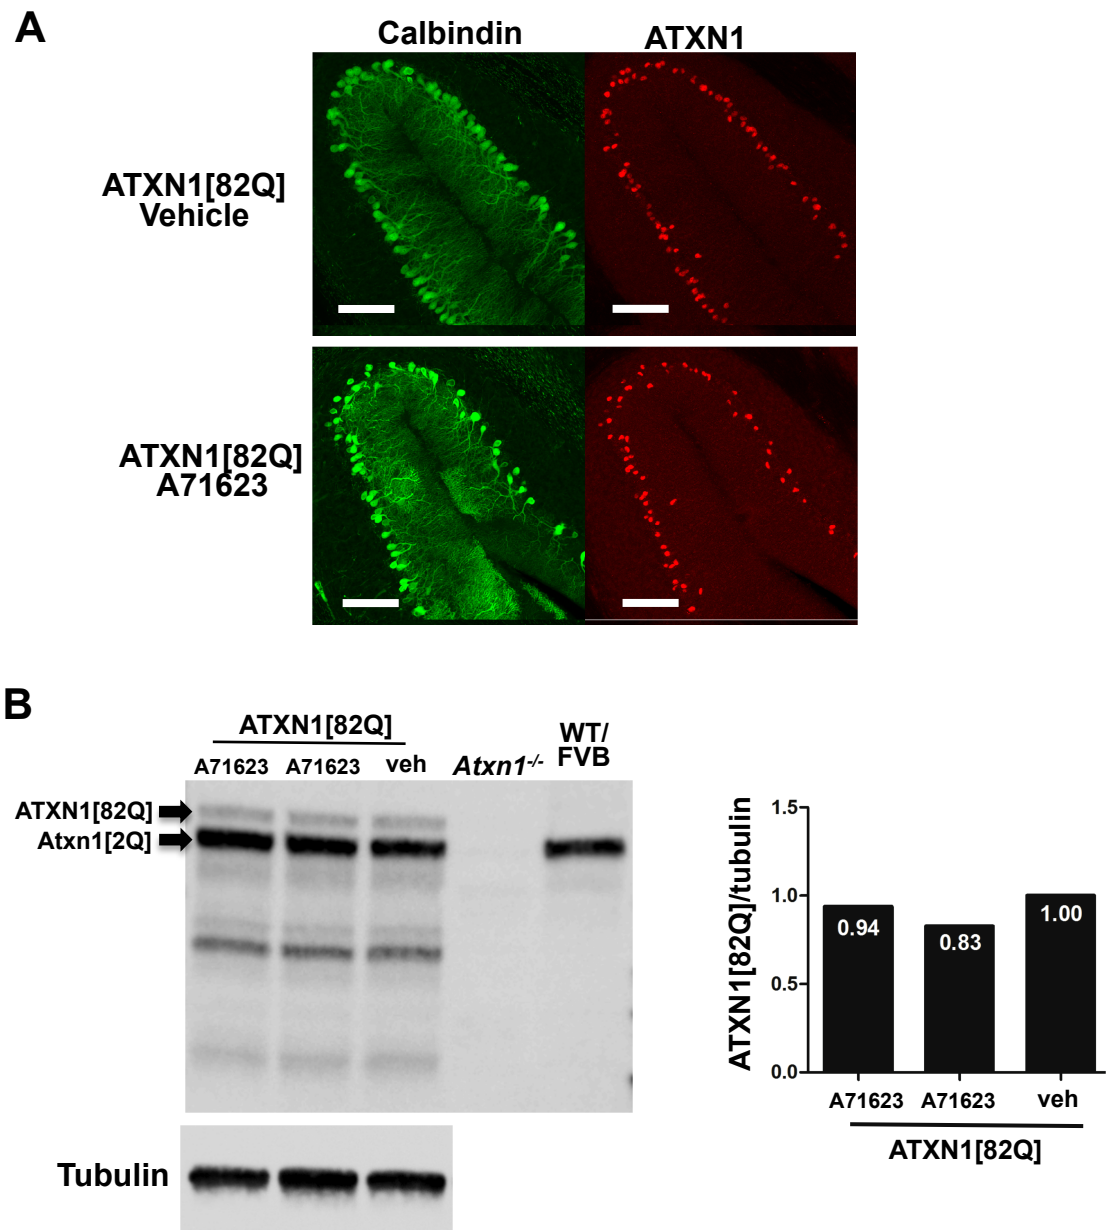

**Figure S5. Administration of Cck1R agonist A71623 does not effect expression of ATXN1[82Q] protein in cerebella of ATXN1[82Q] mice – Related to Figure 3.** A71623 (0.026mg, 30nmoles/Kg/day) or vehicle was Administered for 12 weeks via IP osmotic pumps. A) Immunohistochemical Staining of calbindin (Purkinje cell specific marker) and ATXN1 in Purkinje Cells. B) Western blot analysis of cerebellar ATXN1 expression. Scale bar = 100µM.

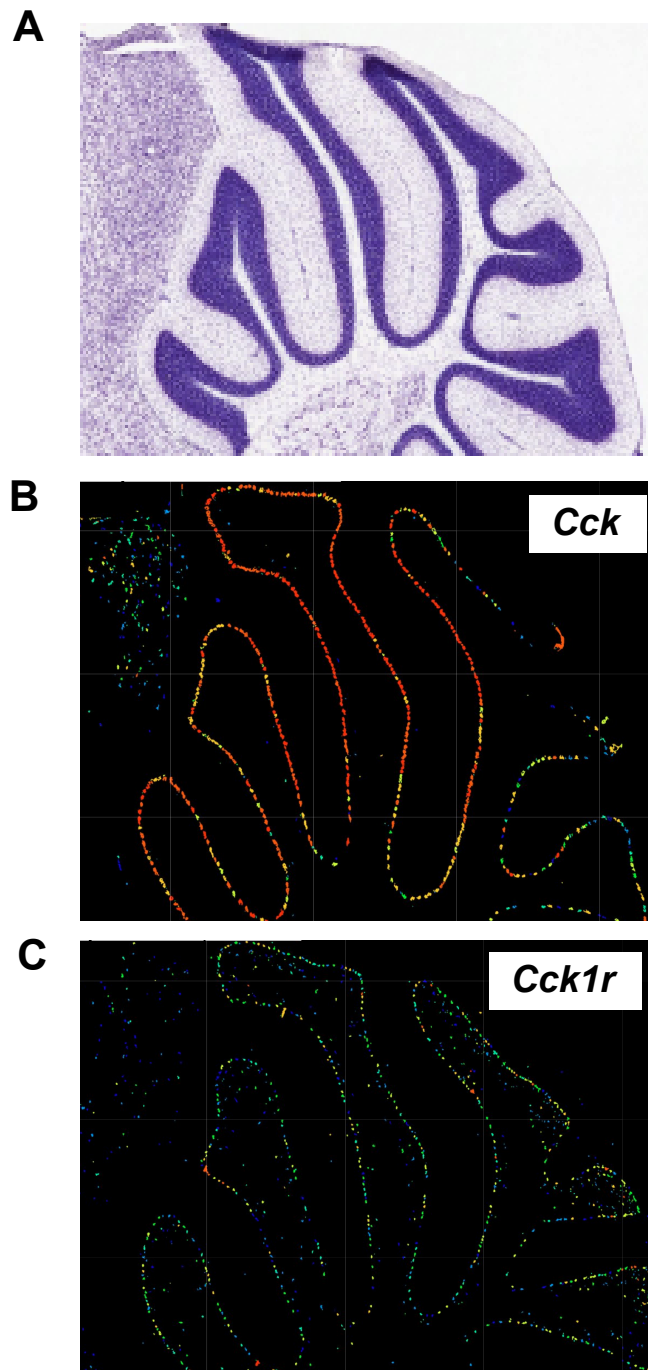

Allen Brain Atlas

**Figure S6. Purkinje cells express Cck and Cck1r – Related to Figure 7.** A) Nissel stained sagittal vermal section. B) In situ hybridization for Cck RNA expression on a sagittal cerebellar vermal section. C) In situ hybridization for Cck1r RNA expression on a sagittal cerebellar vermal section. All images are from Allen Brain Atlas; <http://www.brain-map.org>.

**Supplemental Table 1: Magenta WGCNA Module Gene List - Related to Figure 2.**

|               |          |         |          |          |          |          |         |
|---------------|----------|---------|----------|----------|----------|----------|---------|
| 1700018L02Rik | Ccni     | Fam117a | Id2      | Nab2     | Prpf3    | Slc7a11  | Vwa7    |
| 2310003H01Rik | Cd70     | Fam174b | Igfbp5   | Nadsyn1  | Psd2     | Slc9a3   | Wee1    |
| 2610203C20Rik | Cdh1     | Fam21   | Iltifb   | Nek2     | Ptpm     | Snx9     | Wiz     |
| 2700070H01Rik | Cdk16    | Fam222a | Imp4     | Nell1    | Rab3d    | Soat1    | Wsb2    |
| 2810459M11Rik | Cemip    | Far2    | Inpp4a   | Neurod2  | Rab43    | Spag5    | Ypel4   |
| 4930413G21Rik | Cep104   | Fbxl22  | Inpp5a   | Nexn     | Rabl6    | Spns2    | Ywhah   |
| 6030419C18Rik | Cep72    | Fgd3    | Ipo5     | Nkain1   | Rasal1   | Sppl2b   | Zbtb40  |
| A330050F15Rik | Cep76    | Fgf11   | Irgb1bp1 | Nkd1     | Rbm19    | St3gal5  | Zdhhc14 |
| AK129341      | Cerk     | Fgf13   | Itpka    | Nlgn2    | Rbm22    | St6gal1  | Zfp346  |
| Ablim2        | Chst8    | Fgf7    | Itp1     | Nog      | Rdh11    | Stac     | Zfp385c |
| Adamts3       | Clmn     | Gabbr1  | Jun      | Npr1     | Reep2    | Stap2    | Zfp512  |
| Adsl          | Cmtm3    | Galr1   | Kalrn    | Npy      | Rel1     | Stk17b   | Zfp830  |
| Agfg2         | Cnm4     | Garnl3  | Kcna6    | Nr2f2    | Rgma     | Strip2   |         |
| Aif1          | Cntnap5b | Gchfr   | Kcnab1   | Nsg1     | Rgs8     | Sulf1    |         |
| Aldh7a1       | Colq     | Gfap    | Kcng4    | Ntng1    | Rhobtb2  | Susd4    |         |
| Aldh9a1       | Cox6b2   | Gja1    | Kcnip1   | Ntng2    | Rhod     | Synj2    |         |
| Aldoc         | Cpeb1    | Gjb2    | Kcnmb4   | Nup54    | Rian     | Syt13    |         |
| Ankrd33b      | Creg1    | Gla     | Kcnq4    | Nup93    | Rmdn3    | Taok3    |         |
| Anks1b        | Csad     | Gli1    | Kctd12   | Ociad2   | Rnf145   | Tbpl1    |         |
| Ano6          | Cthrc1   | Gm10190 | Kdelc2   | Opn3     | Rnf157   | Tcf7l1   |         |
| Antxr1        | Ctnbp2   | Gm13944 | Kif1c    | Orai2    | Rnf19b   | Tex261   |         |
| Ap4m1         | Cx3cr1   | Gm16740 | Kif5a    | Otud1    | Rps6kc1  | Tm6sf1   |         |
| Arap1         | Cyth3    | Gm4285  | Klf10    | Padi2    | Rpsd3    | Tmem200b |         |
| Arhgef2       | Dagla    | Gm9866  | Lancl1   | Papss2   | Rspo3    | Tmem231  |         |
| Arhgef33      | Dand5    | Gng13   | Lhfpl2   | Pcdhgb5  | Rtel1    | Tmem255a |         |
| Atf1          | Dap      | Golt1b  | Lhpp     | Pcp4     | Ryr1     | Tmem41a  |         |
| Atl2          | Dbn1d1   | Gp1bb   | Lhx1os   | Pcsk6    | Samd8    | Tmod1    |         |
| Atp2a3        | Ddx49    | Gpatch1 | Lhx5     | Pde5a    | Sbk1     | Tmtc1    |         |
| B330016D10Rik | Dgkz     | Gprc5b  | Lix1     | Pex26    | Scn1b    | Tnc      |         |
| B3gnt2        | Dlg2     | Gria3   | Lnx2     | Phactr3  | Sdc1     | Tob1     |         |
| Baiap2        | Dner     | Grid2   | Lpcat1   | Pkp3     | Sec61a1  | Tprkb    |         |
| Bcar1         | Doc2b    | Grid2ip | Lrrfip1  | Plcb3    | Sema7a   | Trabd2b  |         |
| Bcl10         | Dyrk3    | Grik1   | Lynx1    | Plekhd1  | Sept5    | Trim9b   |         |
| Bcl11a        | Ebf2     | Grm8    | Mapk4    | Plxdc1   | Sfxn1    | Trmt61a  |         |
| Bcl2l11       | Efna3    | Gsg1l   | Mdfi     | Poc1b    | Sh3glb2  | Trp53bp2 |         |
| Bean1         | Eif1a    | Gskip   | Medag    | Polr3k   | Sh3pxd2b | Trpc3    |         |
| Cacna1g       | Eif2ak1  | H2-D1   | Mex3b    | Pou3f4   | Shank2   | Tshz1    |         |
| Cacnb2        | Eif2ak3  | Hdc     | Mfsd12   | Ppapdc2  | Shisa6   | Tspan11  |         |
| Cacng4        | Elfn2    | Heatr5a | Mmp23    | Ppm1j    | Slc16a10 | Ttll3    |         |
| Calb1         | Enpp4    | Hk2     | Mpeg1    | Ppp1r16b | Slc1a6   | Ttll5    |         |
| Capn2         | Ephb2    | Homer3  | Mrps25   | Ppp1r17  | Slc20a1  | Tuba8    |         |
| Car7          | Eps8l2   | Hpca    | Mthfd1l  | Ppp1r1b  | Slc35c1  | Ubash3b  |         |
| Casp3         | Etv4     | Hpcal1  | Mthfsd   | Ppp1r3c  | Slc35f4  | Uspl1    |         |
| Casq2         | Exosc1   | Hrh3    | Mtss1    | Ppp2r2a  | Slc39a6  | Utp23    |         |
| Ccdc120       | Exosc10  | Hrk     | Mxi1     | Ppp4r4   | Slc41a3  | Vgll4    |         |
| Ccdc64        | F2r      | Hs6st1  | Mxra7    | Prdm8    | Slc5a1   | Vimp     |         |
| Ccnd1         | Fam107b  | Icmt    | Myliip   | Prkcg    | Slc6a6   | Vopp1    |         |

**Supplemental Table 2: Pink (plus *ATXN1/82Q*) data) WGCNA Module Gene List - Related to Figure 2.**

|               |          |         |          |         |          |            |          |
|---------------|----------|---------|----------|---------|----------|------------|----------|
| 0610007P14Rik | Axl      | Coro1a  | Fxyd1    | Kcnma1  | Nkain1   | Ptn        | Strip2   |
| 0610009O20Rik | B3gat1   | Cpne2   | Gab1     | Kcnmb4  | Nog      | Ptplb      | Strn3    |
| 1110002L01Rik | B3gnt2   | Creg1   | Gabbr1   | Kctd12  | Nptn     | Ptprm      | Susd4    |
| 1700052N19Rik | Baiap2   | Csad    | Gabbr2   | Kif3b   | Nptx1    | Ptpr       | Syndig1  |
| 3632451O06Rik | Bbc3     | Csdc2   | Garnl3   | Kif3c   | Npy      | Pvalb      | Syt7     |
| 4930506M07Rik | Bcar1    | Cthrc1  | Gdpd1    | Kif5a   | Nsg1     | Rab43      | Tex261   |
| 5031425E22Rik | Bcas1    | Ctnna1  | Gfod1    | Kitl    | Nup93    | Rasgrp1    | Tlcd1    |
| 6030419C18Rik | Bmp1     | Ctsa    | Gja1     | Lancl1  | Ociad2   | R2bm2      | Tm6sf1   |
| A330050F15Rik | Bok      | Cttnbp2 | Glud1    | Large   | Ogfod1   | Rdh11      | Tmem164  |
| AI593442      | Btbd10   | Cyp2j9  | Gm10190  | Lgi3    | Ola1     | Rell1      | Tmem184b |
| AK129341      | Cacna1g  | Cyth3   | Gm13944  | Lhfp12  | Opn3     | Rgma       | Tmem200b |
| Acadl         | Cacnb2   | Dagla   | Gm5083   | Lhpp    | Orai2    | Rgs8       | Tmem255a |
| Acadm         | Cacng7   | Dap     | Gnao1    | Lhx1    | Otud1    | Rhob       | Tmem38a  |
| Actr3b        | Calb1    | Dbn1d1  | Gng13    | Lhx1os  | Paqr4    | Rhobtb2    | Tmem41a  |
| Adam23        | Camk1d   | Ddx49   | Gp1bb    | Limd2   | Parp1    | Rhog       | Tmem64   |
| Adamts1       | Camk2a   | Derl1   | Gpr180   | Lingo3  | Parva    | Rimk1a     | Tmod1    |
| Adcy          | Cap2     | Dgkz    | Gpr63    | Lix1    | Pccb     | Rmdn3      | Tnfsf12  |
| Agfg2         | Car7     | Dhx32   | Grid2    | Lmo2    | Pcdhac2  | Rnf145     | Tnpo2    |
| Ajap1         | Car8     | Dis3l   | Grid2ip  | Lmo4    | Pcp2     | Rnf19b     | Tollip   |
| Akap2         | Casp3    | Dlg2    | Gskip    | Lpgat1  | Pcp4     | Rpl14      | Tom111   |
| Aldh1l1       | Casq2    | Dner    | Gtf2h5   | Lrp8    | Pcsk6    | Rtel1      | Trappc5  |
| Aldoc         | Ccar1    | Doc2b   | Hepacam  | Lrrfip1 | Pde5a    | Rundc3a    | Trim9    |
| Amotl2        | Ccdc107  | Dpp10   | Hey1     | Lrrn2   | Pde9a    | Sbk1       | Trp53bp2 |
| Ankmy2        | Ccnd1    | Dpy19l3 | Hmgn1    | Man1c1  | Pebp1    | Scn4b      | Trpc3    |
| Ankrd13a      | Cd59a    | Dusp16  | Homer3   | Mbd2    | Pepd     | Sdc4       | Tstd2    |
| Ankrd50       | Cd81     | Eif2ak3 | Hpcal1   | Mdfi    | Pi4k2a   | Sec61a1    | Ttll5    |
| Anks1b        | Cdc42ep1 | Ephb2   | Hrk      | Mdk     | Pkd2     | Sema7a     | Tuba4a   |
| Ano3          | Cdc42ep4 | Eps15l1 | Hs6st2   | Medag   | Plcb3    | Sept11     | Tuba8    |
| Ap1ar         | Cdon     | Eps8l2  | Hspa12a  | Mfhas1  | Plekhd1  | Sept5      | Ubash3b  |
| Apip          | Cds1     | Erp29   | lcmt     | Mif4gd  | Plxdc1   | Shank2     | Ube2i    |
| Apoc1         | Celf3    | Etv5    | ld2      | Mmd2    | Pogk     | Shisa6     | Unc13c   |
| Apoe          | Cep104   | Exosc10 | Igfbp3   | Mprip   | Poldip2  | Sipa1l1    | Unc5b    |
| Arap1         | Cep19    | Fabp3   | Igfbp5   | Mt1     | Polr3k   | Slc1a6     | Usp39    |
| Arap2         | Cep76    | Fam107b | Ikbkb    | Mthfsd  | Pou3f3   | Slc20a1    | Vimp     |
| Arhgap20      | Cerk     | Fam174b | Itt1fb   | Mtss1   | Ppapdc2  | Slc39a6    | Vwa7     |
| Arhgap31      | Chchd7   | Fam20a  | Imp4     | Mturn   | Ppp1r16b | Slc41a3    | Wiz      |
| Arhgef2       | Chn1     | Fam21   | Inpp5a   | Mtus2   | Ppp1r17  | Slc6a6     | Wsb2     |
| Arhgef33      | Chrn2    | Fam222a | Inpp5e   | Mxra7   | Ppp1r1b  | Smad3      | Ypel4    |
| Arvcf         | Chst8    | Fam69b  | Ipo5     | Mybpc1  | Ppp4r4   | Snapin     | Ywhah    |
| Astn2         | Cldn12   | Fbxo2   | Itgb1bp1 | Myliip  | Pqlc2    | Snta1      | Zbtb46   |
| At12          | Clec2l   | Fcgrt   | Itpka    | N4bp2l1 | Prkab2   | Spns2      | Zdhhc14  |
| Atp2a2        | Clmn     | Fez2    | Itpr1    | Naaa    | Prkag2   | Sptbn2     | Zdhhc5   |
| Atp2a3        | Clstn2   | Fgf11   | Jund     | Nanp    | Prkcg    | Srsf2      | Zfp346   |
| Atp2b2        | Clta     | Fgf13   | Kcna6    | Ncald   | Prmt8    | St6galnac6 | Zfp385c  |
| Atp6ap1l      | Cml1     | Fgf7    | Kcnab1   | Ndn     | Psd2     | Steap2     |          |
| Atp6v0a2      | Cntfr    | Fgfr1   | Kcng4    | Ndr2    | Ptdss2   | Stim1      |          |
| Atrnl1        | Col18a1  | Foxk2   | Kcnp1    | Nell1   | Ptgr2    | Stk17b     |          |



**Supplemental Table 3: Pink (Minus *ATXN1*[82Q] data) WGCNA Module Gene List - Related to Figure 2.**

|               |          |          |         |         |          |          |          |
|---------------|----------|----------|---------|---------|----------|----------|----------|
| 0610007P14Rik | Cap2     | Dner     | Gpd1    | Kifap3  | Ociad2   | Rnf145   | Tmem35   |
| 3632451O06Rik | Capns1   | Dnm2     | Gpr180  | Kitl    | Ola1     | Rnf19b   | Tmem38a  |
| 4930506M07Rik | Car7     | Doc2b    | Gpr3711 | L1cam   | Opn3     | Rora     | Tmem41a  |
| 5031425E22Rik | Car8     | Dolpp1   | Gpr63   | Lancl1  | Otud1    | Rpl36    | Tmem50b  |
| 6030419C18Rik | Casp3    | Dpp10    | Gria1   | Large   | Paqr4    | Rprd1a   | Tmem59l  |
| A330050F15Rik | Casq2    | Dpy19l3  | Grid2   | Lgalsl  | Parm1    | Rrbp1    | Tmem64   |
| AK129341      | Ccar1    | Dusp1    | Grid2ip | Lgi3    | Pccb     | Rtel1    | Tnfsf12  |
| Abat          | Ccdc107  | Dync1li2 | Grm1    | Lhpp    | Pcdhac2  | Rybp     | Tollip   |
| Abcd2         | Ccnd1    | Ehd3     | Gskip   | Lhx1os  | Pcp4     | Sbk1     | Tom11l   |
| Acadl         | Ccny     | Eif2ak3  | Gtf2h5  | Limd2   | Pcsk6    | Sdc4     | Trim9    |
| Acadvl        | Cd59a    | Elavl2   | H2-Ke6  | Lix1    | Pde5a    | Sdf2     | Trp53bp2 |
| Actr3b        | Cd81     | Ephb1    | H2afv   | Lmna    | Pde9a    | Sec61a1  | Trpc3    |
| Adcy8         | Cdc42ep1 | Eps15l1  | Hadha   | Lmo2    | Pebp1    | Sept4    | Ttc4     |
| Agt           | Cdc42ep4 | Eps8l2   | Hbegf   | Lpgat1  | Peptd    | Sepw1    | Ttll5    |
| Ak6           | Cdk20    | Erp29    | Herc3   | Lrp11   | Pgd      | Serp1b1a | Ttyh2    |
| Amotl2        | Cdon     | Fah      | Hes3    | Lrrc73  | Pip4k2a  | Shank2   | Tub      |
| Ank           | Cds1     | Fam107b  | Homer3  | Lrrn2   | Pkd2     | Shisa    | Tuba4a   |
| Ankrd50       | Celf3    | Fam174b  | Hopx    | Ltbp3   | Plekhd1  | Sipa1l1  | Tuba8    |
| Anks1b        | Cep76    | Fam20a   | Hpcal1  | MacroD2 | Plxdc1   | Sirt7    | Tubb2b   |
| Anxa6         | Chn2     | Fam21    | Hrk     | Man1a2  | Pnrc1    | Slc1a3   | Ubash3b  |
| Apip          | Chst2    | Fam222a  | Hsd11b1 | Map2k1  | Pogk     | Slc1a6   | Ube3c    |
| Apoc1         | Chst8    | Fam69a   | Hspa12a | Map2k4  | Polr3k   | Slc38a3  | Ubl4     |
| Apoe          | Cldn12   | Fam69b   | Icmt    | Mdfi    | Ppapdc1b | Slc41a3  | Ubxn1    |
| Arap1         | Cldn25   | Farp1    | Id2     | Mdk     | Ppp1r16b | Smad3    | Uchl1    |
| Arap2         | Clec2l   | Fbl      | Igfbp3  | Medag   | Ppp1r17  | Smc5     | Unc13c   |
| Arhgap20      | Clmn     | Fbxo2    | Ikbkb   | Mpi     | Ppp1r1b  | Snta1    | Unc5b    |
| Arhgap23      | Clstn2   | Fbxo27   | Iltifb  | Mpp2    | Ppp1r8   | Spg7     | Usp45    |
| Arhgap31      | Clu      | Fez2     | Impa1   | Mpp6    | Ppp4r4   | Spns2    | Vcpkmt   |
| Arhgdia       | Cml1     | Fgf11    | Inpp1   | Mpv17l2 | Pqlc2    | Ss18     | Vwa7     |
| Arhgef2       | Cntfr    | Fgfr1    | Inpp5a  | Mt1     | Prkab2   | Steap2   | Wdr45    |
| Arhgef33      | Cox7a1   | Fgfr3    | Inpp5e  | Mthfsd  | Prkcg    | Stk17b   | Wiz      |
| Atat1         | Cpne2    | Fjx1     | Insig2  | Mtss1   | Prmt8    | Stmn2    | Wwp1     |
| Atl2          | Csad     | Flt3     | Ipo5    | Mturn   | Ptch1    | Stmn3    | Ywhah    |
| Atp2a2        | Csdc2    | Fstl5    | Irf2bp2 | Mtus2   | Ptdss2   | Strip2   | Zbtb46   |
| Atp2a3        | Cst3     | Gadd45b  | Isca1   | Mxra7   | Ptn      | Strn3    | Zdhhc14  |
| Atp6ap1l      | Ctdsp1   | Gadd45g  | Itpka   | Mybpc1  | Ptprr    | Susd4    | Zfp346   |
| Atrnl1        | Cthrc1   | Gal3st3  | Itpr1   | Mylip   | Rab43    | Tab2     | Zfp385c  |
| Axl           | Ctsa     | Garnl3   | Jund    | N6amt2  | Rab5c    | Tdrkh    |          |
| Bai1          | Cttnbp2  | Gdpd1    | Kbtbd4  | Naa35   | Rbm22    | Tex261   |          |
| Bcl2l2        | Cxcl14   | Gja1     | Kcnab1  | Ndn     | Rdh11    | Tlcd1    |          |
| Bmp1          | Cyp2j9   | Glr3     | Kcng4   | Ndufb3  | Rell1    | Tm6sf    |          |
| Bok           | Cyth3    | Gm10190  | Kcnip1  | Nell1   | Rgma     | Tmbim6   |          |
| Btbd10        | Dap      | Gm5083   | Kcnip4  | Neo1    | Rgs7bp   | Tmem184b |          |
| Btg2          | Ddx49    | Gmppa    | Kcnj16  | Nptn    | Rgs8     | Tmem200b |          |
| C1qa          | Derl1    | Gnal     | Kcnma1  | Nptxr   | Rhbdl1   | Tmem25   |          |
| C1ql3         | Dgkz     | Gng13    | Kctd12  | Npy     | Rmdn3    | Tmem255a |          |
| Calb1         | Dlg2     | Gp1bb    | Kif1c   | Nup93   | Rmnd5b   | Tmem30a  |          |
